# Supplementary material
Source: Springer Nature journal article supplement (https://www.springermedizin.de/resource/supplementary/12885_2013_4326_MOESM5_ESM.pdf/9468226)

**A**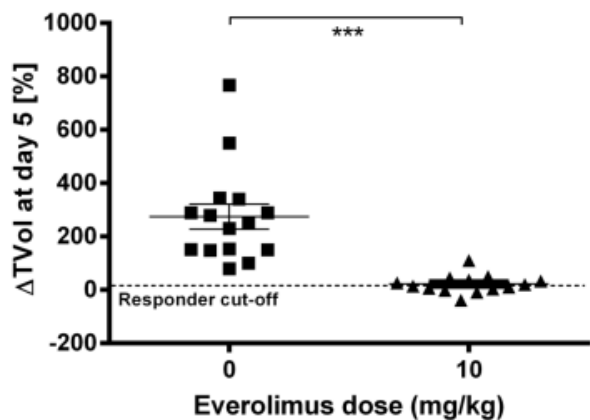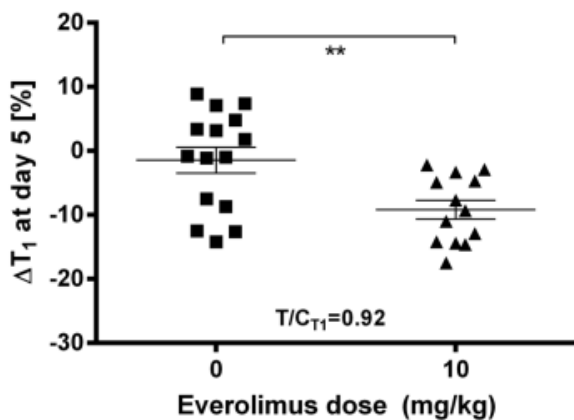**ROC**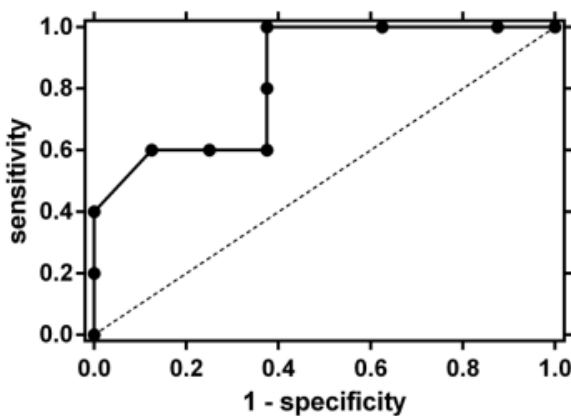**B**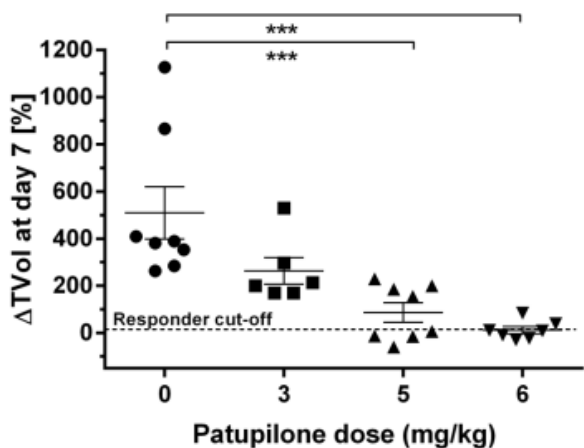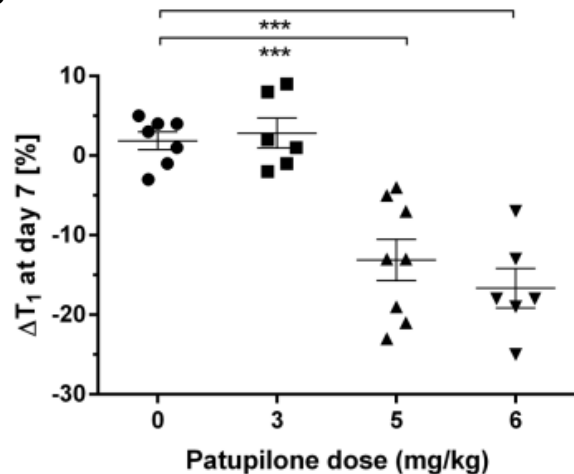**ROC**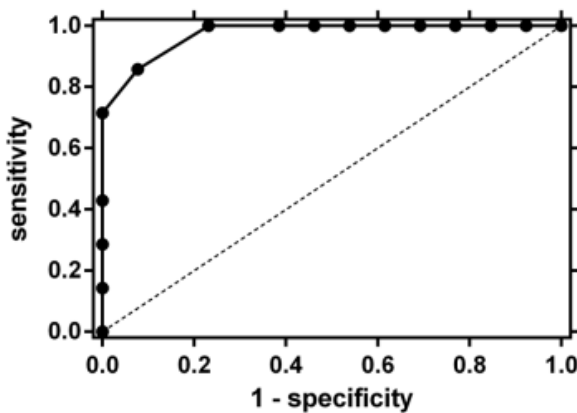

Supplement: MOESM5 [file 9468226]
